# Supplementary material for: Pharmacokinetics of high-titer anti–SARS-CoV-2 human convalescent plasma in high-risk children
Source: JCI journal article supplement (doi:10.1172/jci.insight.151518), 2021-12-02
Supplement: sd1 [file 1]

# Pharmacokinetics of High-titer Anti-SARS-CoV-2 Human Convalescent Plasma in High-risk

## Children

**Authors:** Oren Gordon<sup>1</sup>, Mary Katherine Brosnan<sup>1</sup>, SukMin Yoon<sup>2</sup>, Dawoon Jung<sup>3</sup>, Kirsten Littlefield<sup>2</sup>, Abhinaya Ganesan<sup>2</sup>, Christopher A. Caputo<sup>2</sup>, Maggie Li<sup>2</sup>, William R. Morgenlander<sup>4</sup>, Stephanie Henson<sup>4</sup>, Alvaro A. Ordonez<sup>1</sup>, Trisha De Jesus<sup>1</sup>, Elizabeth W. Tucker<sup>5</sup>, Nadine Peart Akindele<sup>1</sup>, Zexu Ma<sup>2</sup>, Jo Wilson<sup>2</sup>, Camilo A. Ruiz-Bedoya<sup>1</sup>, M. Elizabeth M. Younger<sup>6</sup>, Evan M. Bloch<sup>7</sup>, Shmuel Shoham<sup>8</sup>, David Sullivan<sup>2</sup>, Aaron A. R. Tobian<sup>7</sup>, Kenneth Cooke<sup>9</sup>, Ben Larman<sup>4</sup>, Jogarao V.S. Gobburu<sup>3</sup>, Arturo Casadevall<sup>2</sup>, Andrew Pekosz<sup>2</sup>, Howard Lederman<sup>6</sup>, Sabra L. Klein<sup>2</sup> and Sanjay K. Jain<sup>1\*</sup>

### **Affiliations:**

<sup>1</sup> Division of Infectious Diseases, Department of Pediatrics, Johns Hopkins University School of Medicine, Baltimore, MD, USA.

<sup>2</sup> W. Harry Feinstone Department of Molecular Microbiology and Immunology, Johns Hopkins University Bloomberg School of Public Health, Baltimore, MD, USA

<sup>3</sup> Center for Translational Medicine, University of Maryland School of Pharmacy, Baltimore, MD, USA.

<sup>4</sup> Division of Immunology, Department of Pathology, Johns Hopkins University School of Medicine, Baltimore, MD, USA

<sup>5</sup> Department of Anesthesiology and Critical Care Medicine, Johns Hopkins University School of Medicine, Baltimore, MD, USA.

<sup>6</sup> Division of Immunology, Department of Pediatrics, Johns Hopkins University School of Medicine, Baltimore, MD, USA.

<sup>7</sup> Division of Transfusion Medicine, Department of Pathology, Johns Hopkins School of Medicine, Baltimore, MD, USA

<sup>8</sup> Division of Infectious Diseases, Department of Medicine, Johns Hopkins University School of Medicine, Baltimore, MD, USA

<sup>9</sup> Division of Oncology, Department of Pediatrics, Johns Hopkins University School of Medicine, Baltimore, MD, USA.

\*To whom correspondence should be addressed: 1550 Orleans Street, CRB-II, Rm 1.09, Baltimore, MD, 21287. Phone 410-502-8241. [sjain5@jhmi.edu](mailto:sjain5@jhmi.edu) (S.K.J.)

**Supplemental Table 1. Study participants (recipients).**

| #  | Sex | Age | Race / Ethnicity | Co-morbidities                                                                                         | Weight (kg) | Height / length (cm) | Time to plasma <sup>1</sup> (days) | Recipient / Donor Blood type | Plasma dose (mL/kg) |
|----|-----|-----|------------------|--------------------------------------------------------------------------------------------------------|-------------|----------------------|------------------------------------|------------------------------|---------------------|
| 1  | M   | 9y  | Hispanic         | DICER1-associated parietal lobe sarcoma                                                                | 44.6        | 141                  | 5                                  | O+/O+                        | 5                   |
| 2  | F   | 3m  | AA               | Prematurity, acyanotic Tetralogy of Fallot, chronic lung disease, planned for corrective heart surgery | 4.5         | 53                   | 3                                  | B+/B+                        | 5                   |
| 3  | F   | 4y  | Asian            | Immunodeficiency associated with CARD 11 mutation, IVIG <sup>2</sup> dependent                         | 13.8        | 98                   | 5                                  | O+/O+                        | 5                   |
| 4  | M   | 16y | White            | Crohn's disease, receiving infliximab                                                                  | 64.3        | 172.9                | 4                                  | A-/A-                        | 4                   |
| 5  | M   | 16y | AA               | Asthma                                                                                                 | 65.8        | 174                  | 4                                  | O+/O+                        | 4                   |
| 6  | F   | 15y | White            | Chromosome 18q deletion, CVID, IVIG <sup>2</sup> dependent, chronic lung disease                       | 25.4        | 135.9                | 5                                  | O+/O+                        | 5                   |
| 7  | F   | 5y  | White            | SMA type 1                                                                                             | 12.5        | 88                   | 5                                  | O+/O+                        | 5                   |
| 8  | M   | 17y | White            | S/P Wilms tumor and BMT, asthma                                                                        | 49.1        | 162.5                | 5                                  | A+/A+                        | 4                   |
| 9  | F   | 6y  | White            | Prematurity, chronic lung disease, CVID, IVIG <sup>2</sup> dependent                                   | 16.4        | 106.9                | 3                                  | O+/O+                        | 5                   |
| 10 | F   | 5y  | White            | Ataxia telangiectasia, IVIG <sup>2</sup> dependent                                                     | 19.1        | 102                  | 7                                  | O+/O+                        | 5                   |
| 11 | M   | 13y | White            | Cerebral palsy, epilepsy, pulmonary insufficiency                                                      | 41.7        | 144.8                | 3                                  | A+/A-                        | 5                   |
| 12 | M   | 6y  | AA               | Caroli syndrome, ARPKD, liver and kidney transplant, tracheostomy                                      | 14.1        | 90                   | 2                                  | A+/A+                        | 5                   |
| 13 | M   | 9y  | White            | Ataxia Telangiectasia, chronic lung disease                                                            | 31.5        | -                    | 5                                  | O+/O+                        | 5                   |

<sup>1</sup>Time from symptom onset / exposure to administration of COVID-19 convalescent plasma. <sup>2</sup>P#3 - received IVIG, 10 days before convalescent plasma and then every 3 weeks; P#6 - received SubQ-IG, 4 days before convalescent plasma and then every 7 days; P#9 - received SubQ-IG, 4 days before convalescent plasma and then every 7 days; P#10 - received SubQ-IG, 5 days before convalescent plasma and then every 7 days. F - Female; M - male; y - years; m - months; AA - African American; ARPKD - autosomal recessive polycystic kidney disease; BMT - bone marrow transplant; CVID - common variable immune deficiency; IVIG - intravenous immunoglobulin; SMA - spinal muscular atrophy.

**Supplemental Table 2. Clinical presentation at study entry.**

| <b>Recipient #</b>                                         | <b>Infected children<sup>1</sup></b> | <b>1</b> | <b>2</b>         | <b>3</b> | <b>4</b> | <b>5</b> | <b>6</b>       | <b>7</b>       | <b>8</b> | <b>9</b> | <b>10</b> | <b>11</b>      | <b>12</b> | <b>13</b> |
|------------------------------------------------------------|--------------------------------------|----------|------------------|----------|----------|----------|----------------|----------------|----------|----------|-----------|----------------|-----------|-----------|
| <b>SARS-CoV-2 NP RT-PCR</b>                                | 8 (100%)                             | Pos      | Pos <sup>2</sup> | Neg      | Neg      | Neg      | Pos            | Pos            | Neg      | Neg      | Pos       | Pos            | Pos       | Pos       |
| <b>Fever</b>                                               | 8 (100%)                             | Y        | Y                | N        | N        | N        | Y              | Y              | N        | N        | Y         | Y              | N         | Y         |
| <b>Duration of fever (days)</b>                            | 3 days                               | 3        | 3                | NA       | NA       | NA       | 5              | 5              | NA       | NA       | 1         | 1              | NA        | 2         |
| <b>Cough</b>                                               | 6 (75%)                              | Y        | N                | N        | N        | Y        | Y              | Y              | N        | N        | Y         | Y              | N         | Y         |
| <b>Shortness of breath</b>                                 | 4 (50%)                              | N        | Y                | N        | N        | Y        | Y              | Y              | N        | N        | N         | Y              | N         | N         |
| <b>Congestion and/or runny nose</b>                        | 3 (37.5%)                            | Y        | N                | N        | N        | Y        | Y              | N              | N        | N        | Y         | Y              | Y         | Y         |
| <b>Sore throat</b>                                         | 1 (12.5%)                            | N        | NA               | N        | N        | Y        | NA             | N              | N        | N        | Y         | NA             | N         | N         |
| <b>Diarrhea</b>                                            | 1 (12.5%)                            | N        | N                | N        | N        | N        | N              | N              | N        | N        | Y         | N              | N         | N         |
| <b>Vomiting</b>                                            | 1 (12.5%)                            | N        | N                | N        | N        | N        | N              | Y              | N        | N        | N         | N              | N         | N         |
| <b>Headache</b>                                            | 1 (12.5%)                            | N        | NA               | N        | N        | Y        | NA             | N              | N        | N        | N         | NA             | N         | Y         |
| <b>Rash</b>                                                | 0 (0%)                               | N        | N                | N        | N        | N        | N              | N              | N        | N        | N         | N              | N         | N         |
| <b>Muscle aches</b>                                        | 2 (25%)                              | Y        | NA               | N        | N        | N        | NA             | N              | N        | N        | N         | NA             | N         | Y         |
| <b>Loss of smell or taste</b>                              | 0 (0%)                               | N        | NA               | N        | N        | N        | NA             | N              | N        | N        | N         | NA             | N         | N         |
| <b>Hospitalization</b>                                     | 5 (62.5%)                            | Y        | Y                | N        | N        | N        | Y              | Y              | N        | N        | N         | Y              | N         | N         |
| <b>Length of admission (days)</b>                          | 7 days                               | 3        | 14               | NA       | NA       | NA       | 4              | 7              | NA       | NA       | NA        | 23             | NA        | NA        |
| <b>Admission to PICU</b>                                   | 4 (50%)                              | N        | Y                | N        | N        | N        | Y              | Y              | N        | N        | N         | Y              | N         | N         |
| <b>Length of admission to PICU (days)</b>                  | 5 days                               | NA       | 4                | NA       | NA       | NA       | 4              | 6              | NA       | NA       | NA        | 6              | NA        | NA        |
| <b>Need for supplemental oxygen</b>                        | 4 (50%)                              | N        | Y                | N        | N        | N        | Y              | Y              | N        | N        | N         | Y              | N         | N         |
| <b>Need for non-invasive positive pressure ventilation</b> | 3 (37.5%)                            | N        | N                | N        | N        | N        | Y              | Y              | N        | N        | N         | Y              | N         | N         |
| <b>Other therapy for COVID-19</b>                          | 3 (37.5%)                            | N        | N                | N        | N        | N        | Y <sup>3</sup> | Y <sup>3</sup> | N        | N        | N         | Y <sup>3</sup> | N         | N         |

<sup>1</sup>Children with positive SARS-CoV-2 PCR; Testing performed using research and/or clinically approved tests; <sup>2</sup>Positive by clinically approved test only. N (%) or median days are presented. <sup>3</sup>Remdesivir and dexamethasone. PICU – Pediatric Intensive Care Unit; NA - non-applicable.

**Supplemental Table 3. Laboratory studies at presentation.**

| <b>Recipient #</b>                         | <b>1</b> | <b>2</b> | <b>3</b> | <b>4</b> | <b>5</b> | <b>6</b> | <b>7</b> | <b>8</b> | <b>9</b> | <b>10</b> | <b>11</b> | <b>12</b> | <b>13</b> |
|--------------------------------------------|----------|----------|----------|----------|----------|----------|----------|----------|----------|-----------|-----------|-----------|-----------|
| <b>WBC (k/mm<sup>3</sup>)</b>              | 2        | 12.41    | 28       | 5.28     | 4.78     | 18.78    | 13.08    | 6.82     | 5.12     | 3.74      | 8.18      | 8.78      | 4.69      |
| <b>HGB (g/dL)</b>                          | 6.6      | 15.2     | 10       | 14.2     | 15       | 14.6     | 13       | 14.6     | 10.5     | 13.1      | 15.2      | 12.8      | 14.4      |
| <b>Platelets (k/mm<sup>3</sup>)</b>        | 46       | 321      | 184      | 208      | 309      | 264      | 361      | 288      | 251      | 225       | 166       | 526       | 292       |
| <b>Neutrophil Count (k/mm<sup>3</sup>)</b> | 1.82     | 4.59     | 2.25     | 2.65     | 2.1      | 18.02    | 8.41     | 3.6      | 1.05     | 2.22      | 6.88      | 4.32      | 2.23      |
| <b>Lymphocyte Count (k/mm<sup>3</sup>)</b> | 0.04     | 6.58     | 25.59    | 1.94     | 1.79     | 0.25     | 3.94     | 2.17     | 3.59     | 1.04      | 0.71      | 3.75      | 1.51      |
| <b>Sodium (mEq/L)</b>                      | 136      | 137      | 138      | 139      | 141      | 134      | 133      | 140      | 140      | 140       | 146       | 137       | 141       |
| <b>BUN (mg/dL)</b>                         | 11       | 10       | 10       | 14       | 16       | 6        | 3        | 17       | 14       | 12        | 9         | 8         | 7         |
| <b>Serum Creatinine (mg/dL)</b>            | 0.5      | 0.2      | 0.2      | 0.6      | 0.9      | 0.3      | 0.2      | 1.1      | 0.3      | 0.3       | 0.4       | 0.3       | 0.3       |
| <b>ALT (U/L)</b>                           | 35       | 14       | 13       | 18       | 17       | 27       | 18       | 21       | 13       | 31        | 13        | 19        | 51        |
| <b>CRP (mg/dL)</b>                         | NA       | <0.1     | NA       | NA       | NA       | 9.1      | 1.2      | NA       | NA       | NA        | 5.3       | NA        | NA        |

ALT – alanine aminotransferase test; BUN – blood urea nitrogen; CRP – c-reactive protein; HGB – hemoglobin; NA – non-applicable; WBC – white blood cell count.

**Supplemental Table 4. Follow up evaluation 7 to 60 days post-transfusion of convalescent plasma.**

| <b>Recipient #</b>                                         | <b>1</b>      | <b>2</b>     | <b>3</b> | <b>4</b>             | <b>5</b> | <b>6</b>         | <b>7</b>                  | <b>8</b> | <b>9</b> | <b>10</b>    | <b>11</b>    | <b>12</b> | <b>13</b> |
|------------------------------------------------------------|---------------|--------------|----------|----------------------|----------|------------------|---------------------------|----------|----------|--------------|--------------|-----------|-----------|
| <b>Fever</b>                                               | N             | N            | N        | Day 10-12            | N        | N                | N                         | N        | N        | N            | N            | N         | N         |
| <b>Cough</b>                                               | Until day 9   | N            | N        | Day 10-12            | N        | N                | N                         | N        | N        | Until day 10 | Y            | N         | N         |
| <b>Shortness of breath</b>                                 | N             | N            | N        | N                    | N        | Resolved at day7 | N                         | N        | N        | N            | Y            | N         | N         |
| <b>Congestion and/or runny nose</b>                        | N             | N            | N        | N                    | N        | N                | N                         | N        | N        | Y            | Y            | Y         | N         |
| <b>Sore throat</b>                                         | N             | N            | N        | Day 10-12            | N        | NA               | N                         | N        | N        | N            | NA           | N         | N         |
| <b>Diarrhea</b>                                            | N             | N            | N        | N                    | N        | N                | N                         | N        | N        | N            | N            | N         | N         |
| <b>Vomiting</b>                                            | N             | N            | N        | N                    | N        | N                | N                         | N        | N        | N            | N            | N         | N         |
| <b>Headache</b>                                            | Days 7-11     | NA           | N        | N                    | N        | NA               | N                         | N        | N        | N            | NA           | N         | N         |
| <b>Rash</b>                                                | N             | N            | N        | N                    | N        | N                | N                         | N        | N        | N            | N            | N         | N         |
| <b>Muscle aches</b>                                        | N             | NA           | N        | N                    | N        | NA               | N                         | N        | N        | N            | NA           | N         | N         |
| <b>Loss of smell or taste</b>                              | Until day 11  | NA           | N        | N                    | N        | NA               | N                         | N        | N        | N            | NA           | N         | N         |
| <b>COVID related hospitalization</b>                       | N             | N            | N        | N                    | N        | Until day 7      | N                         | N        | N        | N            | Until day 23 | N         | N         |
| <b>Need for supplemental oxygen</b>                        | N             | N            | N        | N                    | N        | Until day 7      | N                         | N        | N        | N            | Until day 15 | N         | N         |
| <b>Need for non-invasive positive pressure ventilation</b> | N             | N            | N        | N                    | N        | Until day 5      | Back to baseline at day 7 | N        | N        | N            | Until day 6  | N         | N         |
| <b><sup>1</sup>SARS-CoV-2 NP RT-PCR</b>                    | Neg at day 14 | Neg at day 7 | Neg      | Pos at day 12 and 21 | N        | Missing data     | Neg at day 34             | N        |          |              |              |           |           |

<sup>1</sup>See Supplemental Figure 1B for additional details. NA – non-applicable.

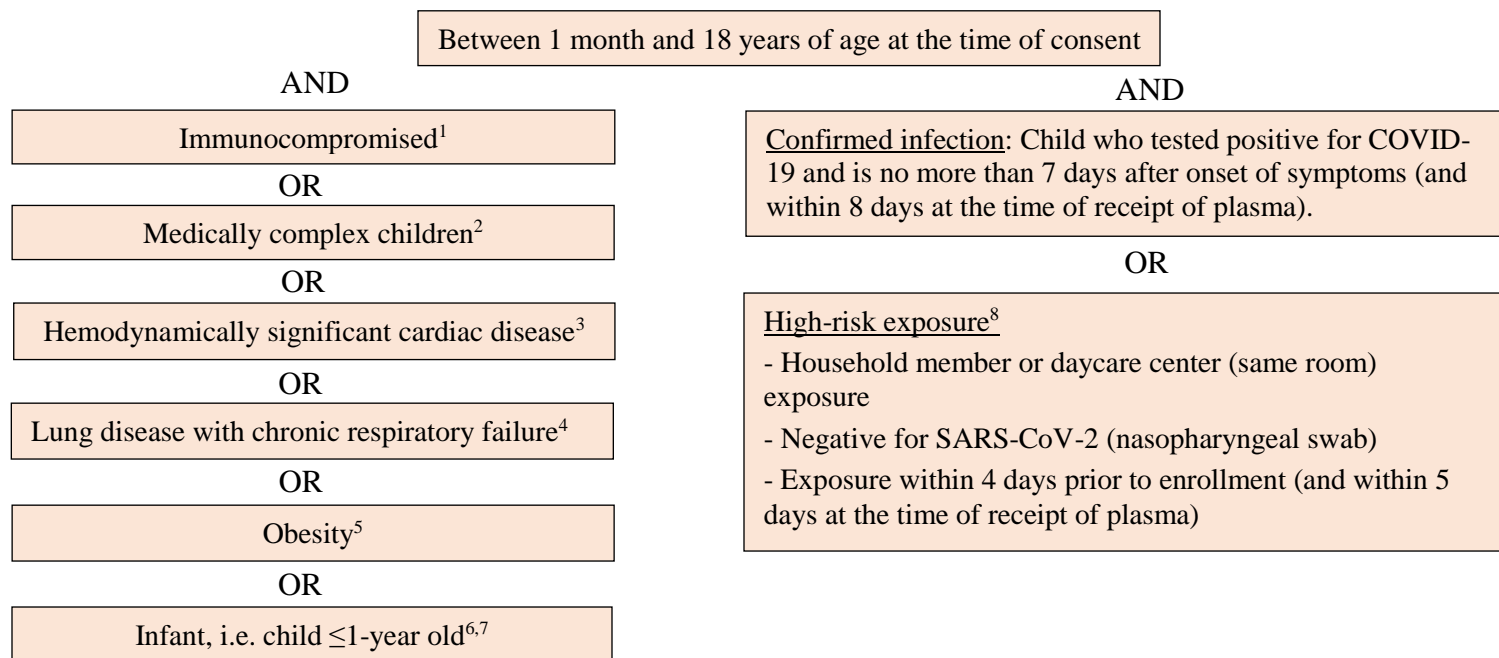

<sup>1</sup>Primary or acquired immunodeficiency e.g. recipient of a bone marrow or solid organ transplant in the last 12 months (or at any time if concurrent with graft-versus host disease), recipient of chemotherapy for a malignancy within the past 6 months, HIV with CD4 (<30% for ≤12 months old; <25% for 12–35 months; <20% for 36–59 months or <350 for all other ages), receiving immunosuppressive or immunomodulatory treatments (e.g., high-dose steroids [≥2 mg/kg/day of systemic prednisone or equivalent for ≥14 days], tacrolimus, sirolimus, cyclosporine, antithymocyte globulin - ATG, mycophenolate, methotrexate, etc.)

<sup>2</sup>Defined as children who has long-term dependence on technological support (including tracheotomy) associated with developmental delay and/or genetic anomalies (Shekerdemian LS, Mahmood NR, Wolfe KK, et al. Characteristics and Outcomes of Children With Coronavirus Disease 2019 (COVID-19) Infection Admitted to US and Canadian Pediatric Intensive Care Units. *JAMA Pediatrics* 2020)

<sup>3</sup>Hemodynamically significant cardiac disease (e.g., congenital heart disease)

<sup>4</sup>Lung disease with chronic respiratory failure (e.g., patients with asthma, cystic fibrosis, bronchiectasis, chronic lung disease of prematurity, tracheostomy / ventilator dependency, restrictive lung disease, severe neuromuscular disease, etc.)

<sup>5</sup>Defined as a body mass index (BMI) ≥95<sup>th</sup> percentile for children and teens of the same age and sex (CDC. "Defining Childhood Obesity" <https://www.cdc.gov/obesity/childhood/defining.html>. 2018; 3 July. CDC. "People with Certain Medical Conditions" <https://www.cdc.gov/coronavirus/2019-ncov/need-extra-precautions/people-with-medical-conditions.html> 2020; 30 July).

<sup>6</sup>CDC. Coronavirus Disease 2019 in Children — United States, February 12–April 2, 2020. [https://www.cdc.gov/mmwr/volumes/69/wr/mm6914e4.htm?s\\_cid=mm6914e4\\_e&deliveryName=USCDC\\_921-DM25115](https://www.cdc.gov/mmwr/volumes/69/wr/mm6914e4.htm?s_cid=mm6914e4_e&deliveryName=USCDC_921-DM25115) 2020.

<sup>7</sup>Dong Y, Mo X, Hu Y, et al. Epidemiological Characteristics of 2143 Pediatric Patients With 2019 Coronavirus Disease in China. *Pediatrics* 2020; e20200702.

<sup>8</sup>All criteria below should be met

## Supplementary Figure 1. Eligibility criteria

## A Anti-spike IgG

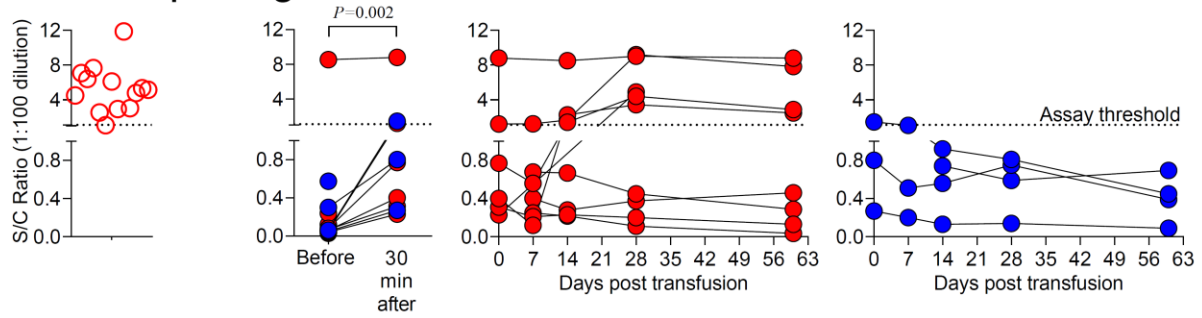

## B Anti-spike IgA

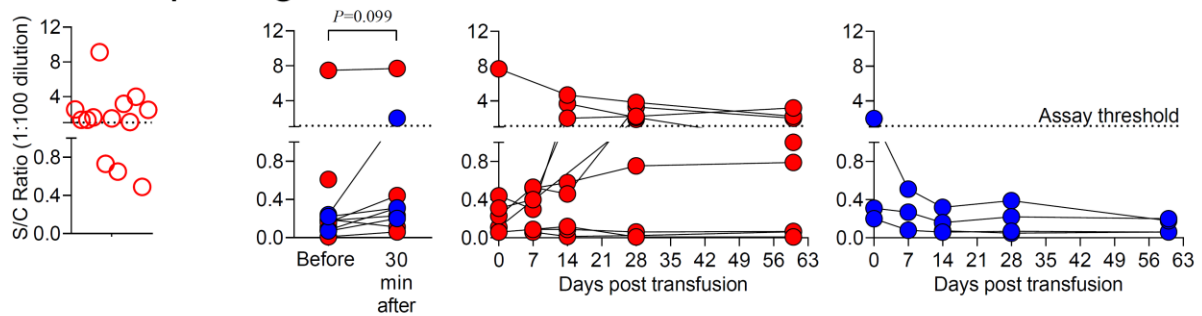

## C Anti-nucleocapsid protein IgM/IgA/IgG

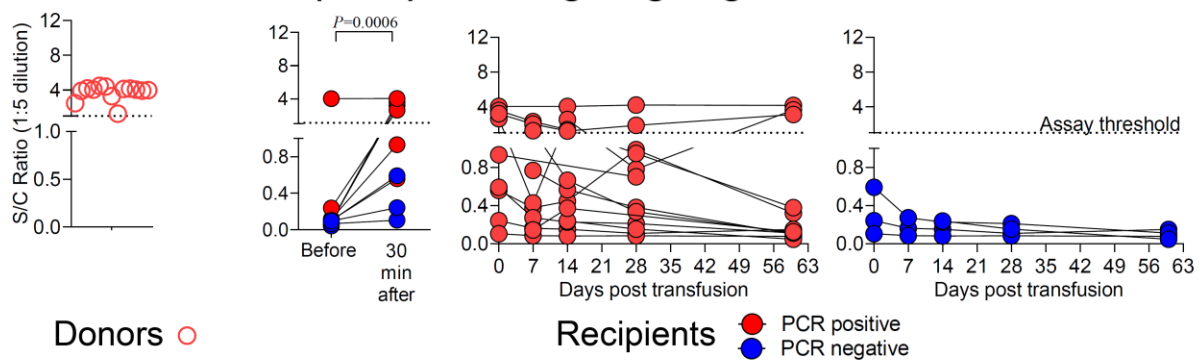

**Supplementary Figure 2. Antibody titers in donors and recipient plasma measured by commercial assays.** Results presented as signal to cut-off ratio (S/C). Recipients are graphed separately based on SARS-CoV-2 positivity, with those PCR negative (blue) on far right. Anti-spike IgG (A) and IgA (B) antibodies measured by ELISA (Euroimmun, Lubeck, Germany). Y-axes are segmented to demonstrate the manufacturer recommended assay thresholds: negative (S/C ratio < 0.8), borderline, (S/C ratio  $\geq 0.8$  & < 1.1) or positive (S/C ratio  $\geq 1.1$ ). (C) Anti-nucleocapsid (N) IgM/IgA/IgG measured using EIA (BioRad Platelia, Marnes-la-Coquette, France). Y-axes are segmented to demonstrate the manufacturer recommended assay thresholds: negative (S/C ratio < 0.8), borderline, (S/C ratio  $\geq 0.8$  & < 1.0) or positive (S/C ratio  $\geq 1.0$ ). For all assays,  $n=13$  pairs of donors and recipients. A two-tailed Mann-Whitney U test was used to compare donor to recipient titers and recipient titers before and 30 minutes after transfusion. The corresponding  $p$ -values are shown.

# A Summary of PK analysis

|     | Weight (kg) | Anti-Spike IgG |                         | Anti-RBD IgG |                         |
|-----|-------------|----------------|-------------------------|--------------|-------------------------|
|     |             | CL (AUC/day)   | T <sub>1/2</sub> (days) | CL (AUC/day) | T <sub>1/2</sub> (days) |
| R2  | 4.49        | 1.05           | 22.9                    | 0.74         | 21.5                    |
| R3  | 13.8        | 0.77           | 7.3                     | 1.1          | 9.2                     |
| R4  | 64.3        | 1.68           | 18.6                    | 0.98         | 13                      |
| R5  | 65.8        | 1.73           | 6.3                     | 2.05         | 7.6                     |
| R8  | 49.1        | 0.86           | 15.5                    | 0.73         | 34.3                    |
| R9  | 16.4        | 3.24           | 17.2                    | 0.49         | 10.1                    |
| R10 | 19.1        | 0.67           | 17.7                    | 0.49         | 11.8                    |

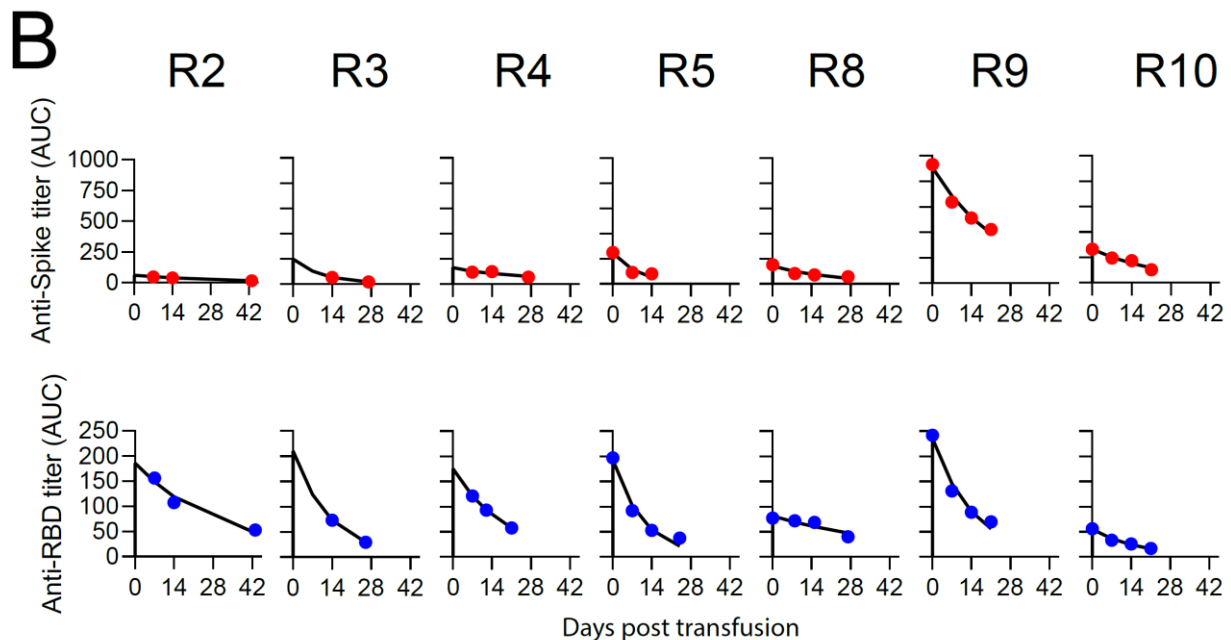

**Supplementary Figure 3. Pharmacokinetic (PK) analysis of antibody titers in recipients.** (A) Model predicted PK characteristics. Clearance (CL) and half-life (T<sub>1/2</sub>) of anti-spike and anti-RBD IgG were estimated using two stage analysis. (B) Individual predictions of anti-spike and anti-RBD IgG from PK analysis. Red and blue dots represent the observed titers and black lines present the predicted time course of titers.



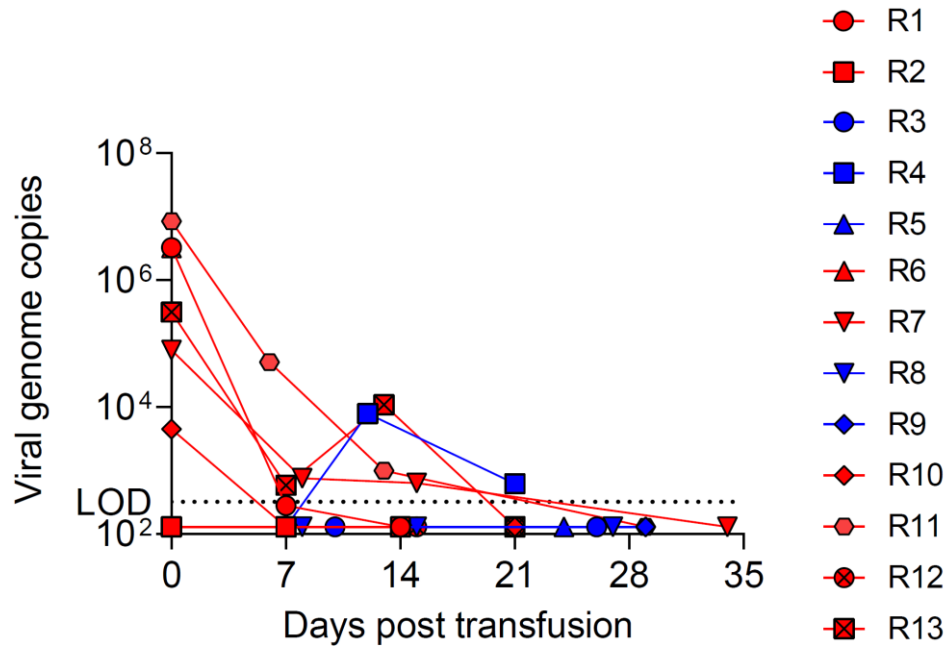

**Supplementary Figure 4. Quantitative SARS-CoV-2 PCR.** Nasopharyngeal swabs were taken on the day of and weekly following plasma administration for up to 4-5 weeks. Viral genome copies are shown for each recipient (red for PCR-positive and blue for PCR-negative). For recipients R2 and R12, a clinical (non-quantitative) SARS-CoV-2 PCR was positive at day 0. LOD – limit of detection.
